# Supplementary material for: Symmetry Breaking and Cooperative Spin Crossover in a Hofmann-Type Coordination Polymer Based on Negatively Charged {FeII(μ2-[MII(CN)4])2}n2n– Layers (MII = Pd, Pt)
Source: PubMed Central journal article supplement (PMC10428219; doi:10.1021/acs.inorgchem.3c01332), 2023-08-01

## Supporting Information

### Symmetry breaking and cooperative spin crossover in a Hofmann-type coordination polymer based on negatively charged $\{\text{Fe}^{\text{II}}(\mu_2\text{-}[\text{M}^{\text{II}}(\text{CN})_4]_2)\}_n^{2n-}$ layers ( $\text{M}^{\text{II}} = \text{Pd}, \text{Pt}$ ).

Alejandro Orellana-Silla, Manuel Meneses-Sánchez, Rubén Turo-Cortés, M. Carmen Muñoz, Carlos Bartual-Murgui and José Antonio Real

### Contents

- Experimental and calculated X-ray diffraction patterns for **dpyanM** (Figure S1). *Page 2*
- Room-temperature Infra-red spectrum of **dpyanM** (Figure S2). *Page 2*
- Selected crystallographic data for **dpyanM** (M = Pd, Pt). (Table S1). *Page 3*
- Relative angles defined between the different aromatic rings for **dpyanM** (Table S2). *Page 3*
- Short intermolecular contacts at 120 K for **dpyanM** (M = Pd, Pt) (Figure S3). *Page 4*
- Short intermolecular  $\pi$ - $\pi$  contacts at 120 K for **dpyanM** (M = Pd, Pt) (Figure S4). *Page 5*

**Figure S1.** Experimental (blue line) and calculated (red line) X-ray diffraction patterns for **dpyanPt** and **dpyanPd**. Experimental patterns were recorded at 295 K while the simulated ones correspond to the single crystal data recorded at 230 K, both in the HS state.

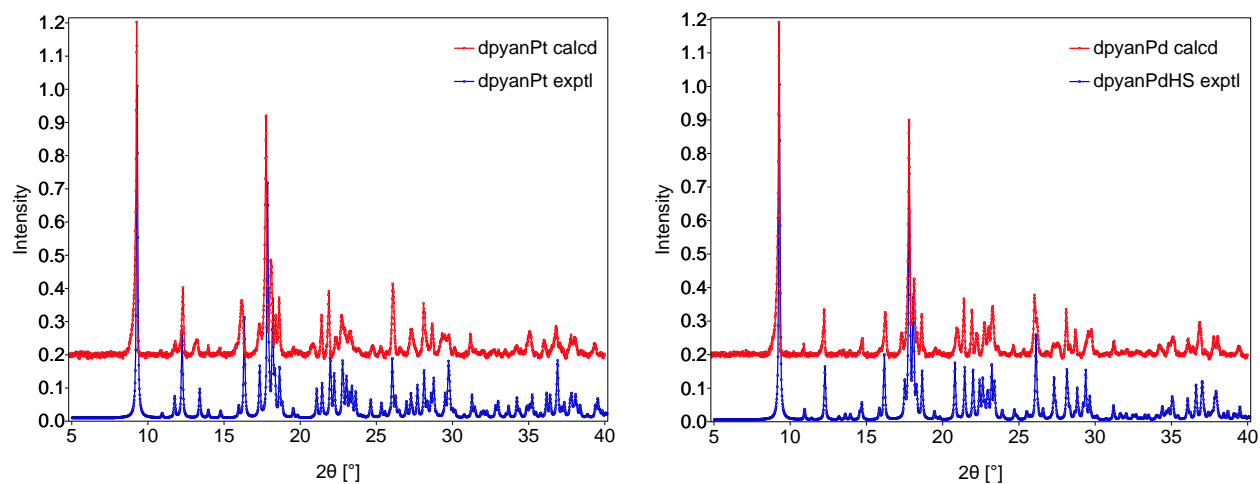

**Figure S2.** Room temperature Infra-red spectrum of **dpyanPt** (black line) and **dpyanPd** (red line).

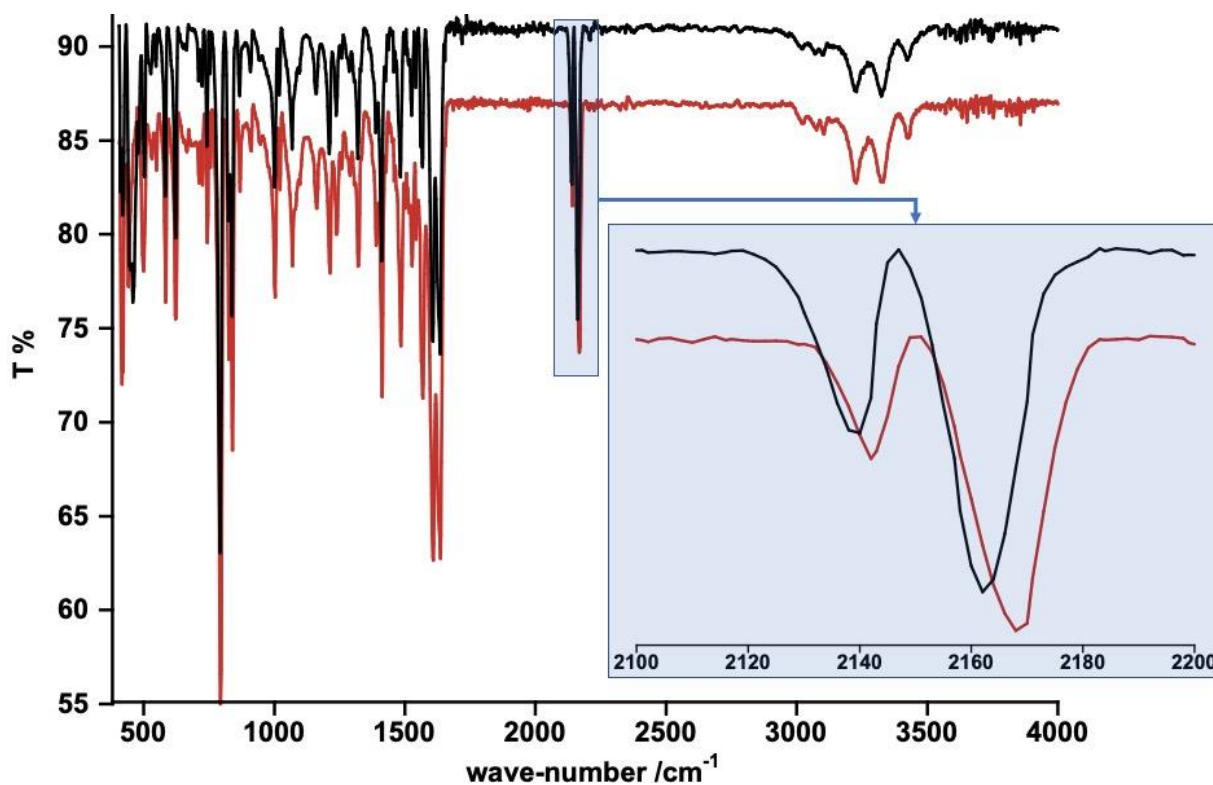

**Table S1.** Crystal data for **dpyanM** (M = Pd, Pt).

|                                                         | <b>dpyanPd</b>                                                     |                         | <b>dpyanPt</b>                                                     |                         |
|---------------------------------------------------------|--------------------------------------------------------------------|-------------------------|--------------------------------------------------------------------|-------------------------|
| Empirical formula                                       | C <sub>40</sub> H <sub>28</sub> N <sub>14</sub> Pd <sub>2</sub> Fe |                         | C <sub>40</sub> H <sub>28</sub> N <sub>14</sub> Pt <sub>2</sub> Fe |                         |
| <i>Mr</i>                                               | 973.41                                                             |                         | 1150.79                                                            |                         |
| Crystal system                                          | monoclinic                                                         |                         | monoclinic                                                         |                         |
| <b>T (K)</b>                                            | <b>120</b>                                                         | <b>230</b>              | <b>120</b>                                                         | <b>230</b>              |
| Space group                                             | <i>Pn</i>                                                          | <i>P2<sub>1</sub>/n</i> | <i>Pn</i>                                                          | <i>P2<sub>1</sub>/n</i> |
| <i>a</i> (Å)                                            | 10.3482(2)                                                         | 10.4699(4)              | 10.3331(2)                                                         | 10.5387(3)              |
| <i>b</i> (Å)                                            | 14.2651(2)                                                         | 13.4013(6)              | 14.3472(2)                                                         | 13.2045(5)              |
| <i>c</i> (Å)                                            | 13.7781(4)                                                         | 14.9020(6)              | 13.6750(2)                                                         | 14.8914(4)              |
| $\beta$ (°)                                             | 109.309(3)                                                         | 104.836(4)              | 109.665(2)                                                         | 104.138(3)              |
| <i>V</i> (Å <sup>3</sup> )                              | 1919.49(8)                                                         | 2021.20(15)             | 1909.09(6)                                                         | 2009.49(11)             |
| <i>Z</i>                                                | 2                                                                  | 2                       | 2                                                                  | 2                       |
| <i>D<sub>c</sub></i> (mg cm <sup>-3</sup> )             | 1.684                                                              | 1.599                   | 2.002                                                              | 1.902                   |
| <i>F</i> (000)                                          | 968                                                                | 968                     | 1096                                                               | 1096                    |
| $\mu$ (Mo-K $\alpha$ ) (mm <sup>-1</sup> )              | 1.351                                                              | 1.283                   | 7.736                                                              | 7.349                   |
| Crystal size (mm)                                       | 0.03x0.15x0.15                                                     |                         | 0.02x0.10x0.10                                                     |                         |
| No. of total reflections                                | 7797                                                               | 4208                    | 7645                                                               | 4366                    |
| No. of reflections [ <i>I</i> >2 $\sigma$ ( <i>I</i> )] | 6448                                                               | 2813                    | 7013                                                               | 3465                    |
| <i>R</i> [ <i>I</i> >2 $\sigma$ ( <i>I</i> )]           | 0.0411                                                             | 0.0499                  | 0.0339                                                             | 0.0404                  |
| <i>wR</i> [ <i>I</i> >2 $\sigma$ ( <i>I</i> )]          | 0.0824                                                             | 0.1083                  | 0.0649                                                             | 0.0940                  |
| <i>S</i>                                                | 1.065                                                              | 1.058                   | 1.149                                                              | 1.071                   |

$$R = \sum ||F_o| - |F_c|| / \sum |F_o|; wR = [\sum [w(F_o^2 - F_c^2)^2] / \sum [w(F_o^2)^2]]^{1/2}.$$

$$w = 1 / [\sigma^2(F_o^2) + (m P)^2 + n P] \text{ where } P = (F_o^2 + 2F_c^2) / 3;$$

$$m = 0.0271 \text{ (1)}, 0.0435 \text{ (2)}, 0.0219 \text{ (3)}, \text{ and } 0.0485 \text{ (4)};$$

$$n = 4.0407 \text{ (1)}, 5.5143 \text{ (2)}, 3.0495 \text{ (3)}, \text{ and } 10.0038 \text{ (4)}$$

**Table S2.** Relative angles between the different aromatic rings for **dpyanM** (M = Pd, Pt). See atom numbering in Figure 3.

| Aromatic Ring A/Ring B                         | <b>dpyanPt</b>             |                            | Aromatic Ring A/Ring B                      | <b>dpyanPt</b>             | <b>dpyanPd</b>             |
|------------------------------------------------|----------------------------|----------------------------|---------------------------------------------|----------------------------|----------------------------|
|                                                | Angle(°)<br><b>(120 K)</b> | Angle(°)<br><b>(120 K)</b> |                                             | Angle(°)<br><b>(230 K)</b> | Angle(°)<br><b>(230 K)</b> |
| Py(N12)/PhN(14)H <sub>2</sub>                  | 45.56                      | 47.38                      | Py(N1)/PhN(4)H <sub>2</sub>                 | 43.77                      | 46.23                      |
| PhN(14)H <sub>2</sub> /Py(N13H13) <sup>+</sup> | 30.54                      | 28.05                      | PhN(4)H <sub>2</sub> /Py(N3H3) <sup>+</sup> | 8.19                       | 7.06                       |
| Py(N12)/Py(N13H13) <sup>+</sup>                | 76.06                      | 75.39                      | Py(N1)/Py(N3H3) <sup>+</sup>                | 37.82                      | 40.83                      |
| Py(N1)/PhN(11)H <sub>2</sub>                   | 36.70                      | 37.18                      |                                             |                            |                            |
| PhN(11)H <sub>2</sub> /Py(N10H10) <sup>+</sup> | 27.46                      | 25.71                      |                                             |                            |                            |
| Py(N1)/Py(N10H10) <sup>+</sup>                 | 63.17                      | 61.97                      |                                             |                            |                            |
| Py(N1)/Py(N12)                                 | 78.51                      | 78.86                      | Py(N1)/Py(N1)                               | 0                          | 0                          |

**Figure S3.** Short intermolecular contacts at 120 K for **dpyanM** (M = Pd, Pt) (marked in red correspond to those which are smaller than the sum of the van der Waals radii). Only interactions between layers  $n+1$  and  $n$  are shown (red-blue rods). An equivalent distribution of short contacts occurs between layers  $n$  and  $n-1$ .

| 120 K        |                 |                 |
|--------------|-----------------|-----------------|
| NC...C(Ring) | dpyanPd<br>d(Å) | dpyanPd<br>d(Å) |
| C2...C24     | 3.362           | 3.334           |
| C3...C16     | 3.361           | 3.350           |
| C2...C32     | 3.507           | 3.471           |
| C8...C37     | 3.241           | 3.270           |
| C8...C38     | 3.305           | 3.308           |
| C4...C16     | 3.589           | 3.578           |
| C5...C20     | 3.585           | 3.591           |
| C8...C39     | 3.616           | 3.578           |
| C8...C40     | 3.651           | 3.578           |
| C3...C24     | 3.572           | 3.554           |
| C5...C31     | 3.579           | 3.616           |
| C5...C24     | 3.653           | 3.586           |

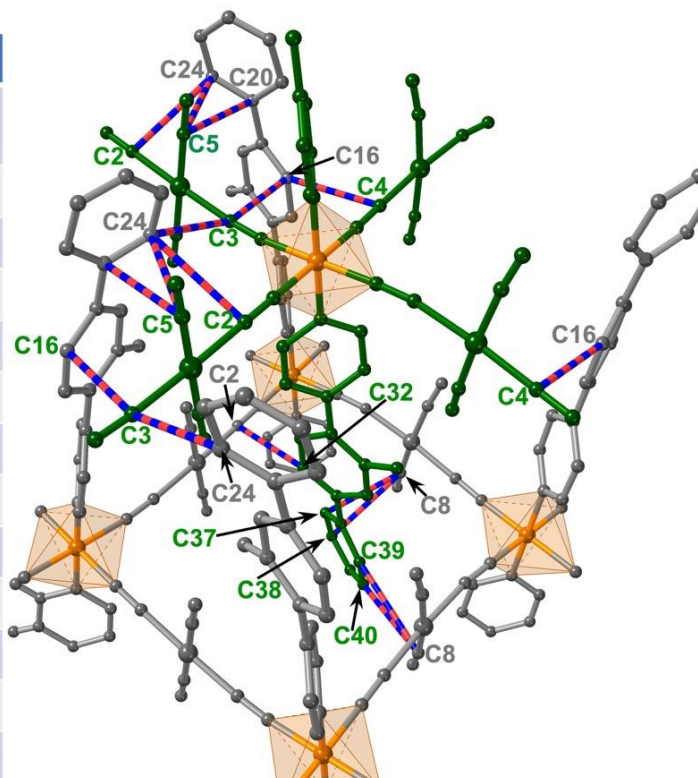

**Figure S4.** Short intermolecular  $\pi$ - $\pi$  contacts at 120 K for **dpyanM** (M = Pd, Pt) (marked in red correspond to those close to the sum of the van der Waals radii).

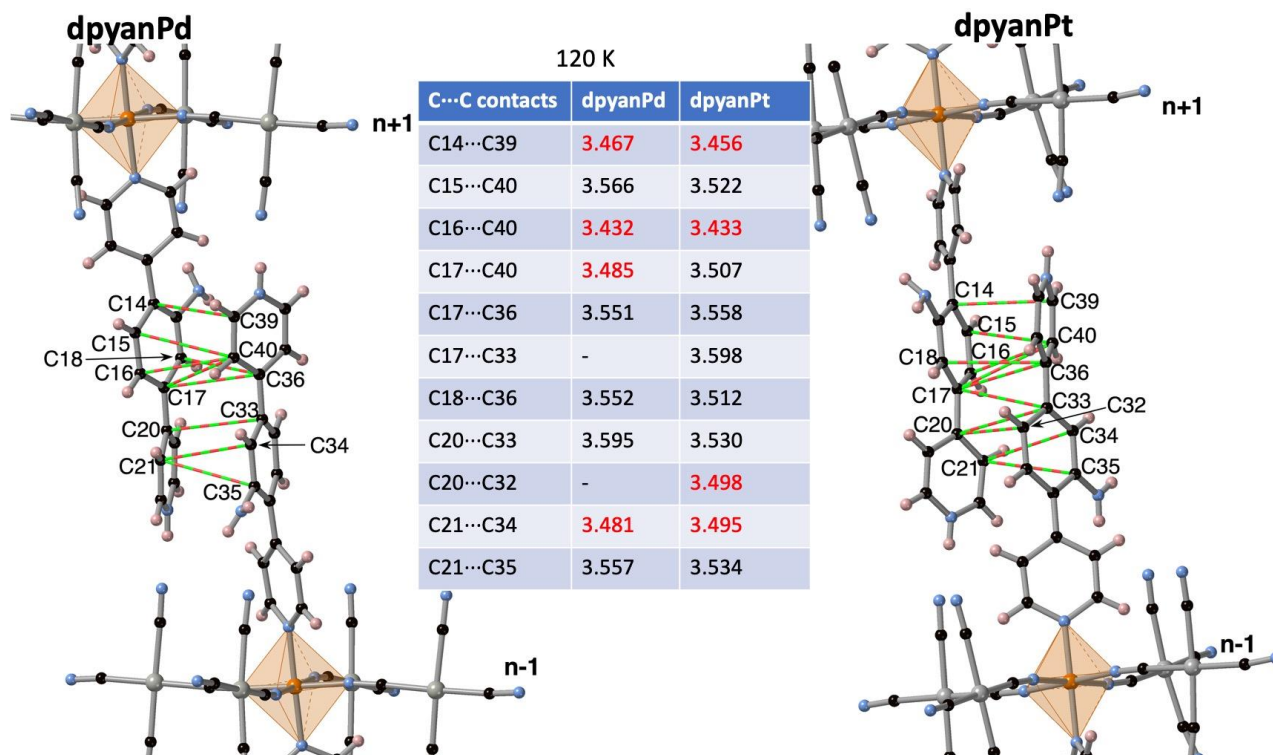

Supplement: ic3c01332_si_001.pdf [file ic3c01332_si_001.pdf]
